# Supplementary material
Source: PubMed Central journal article supplement (PMC5982810)
Supplement: mxx020grosswebmaterialfinal.pdf [file mxx020grosswebmaterialfinal.pdf]

## Web Appendix. Full Search Strategy

### Ovid Medline

|    |                                                                                                                                         |
|----|-----------------------------------------------------------------------------------------------------------------------------------------|
| 1. | exp Aged/ or exp Geriatrics/                                                                                                            |
| 2. | (ageing or latelife or laterlife or "late life" or "later life" or elder* or Geron* or Geriatr* or senior* or older).tw.                |
| 3. | (old* adj3 (age* or adult* or population* or communit* or people* or person*)).tw.                                                      |
| 4. | ((aging or aged) adj3 (adult* or population* or communit* or people* or person*)).tw.                                                   |
| 5. | 1 or 2 or 3 or 4                                                                                                                        |
| 6. | exp Prisoners/                                                                                                                          |
| 7. | (incarcerat* or prison* or inmate* or correctional facilit* or correctional setting* or correctional system* or Imprison* or penal).tw. |
| 8. | (Parole* OR offender* OR crimin* OR inmate* OR penitentiari* OR detain* OR sentenced OR convict* OR (justice adj3 involved)).tw.        |
| 8. | 6 or 7 or 8                                                                                                                             |
| 9. | 5 and 8                                                                                                                                 |

### Cochrane

|     |                                                                                                                                     |
|-----|-------------------------------------------------------------------------------------------------------------------------------------|
| #1  | MeSH descriptor: [Aged] explode all trees                                                                                           |
| #2  | MeSH descriptor: [Geriatrics] explode all trees                                                                                     |
| #3  | (ageing or latelife or laterlife or "late life" or "later life" or elder* or Geron* or Geriatr* or senior*)                         |
| #4  | (old* near/3 (age* or adult* or population* or people* or person*))                                                                 |
| #5  | ((aging or aged) near/3 (adult* or population* or people* or person*))                                                              |
| #6  | #1 or #2 or #3 or #4 or #5                                                                                                          |
| #7  | MeSH descriptor: [Prisoners] explode all trees                                                                                      |
| #8  | (incarcerat* or prison* or inmate* or correctional facilit* or correctional setting* or correctional system* or Imprison* or penal) |
| #9  | Parole* or offender* or crimin* or inmate* or penitentiari* or detain* or sentenced or convict* or (justice near/3 involved)        |
| #10 | #7 or #8 or #9                                                                                                                      |
| #11 | #6 and #10                                                                                                                          |

### Embase

|    |                                                                                                                                                                                |
|----|--------------------------------------------------------------------------------------------------------------------------------------------------------------------------------|
| #1 | 'aged'/exp OR 'geriatrics'/exp                                                                                                                                                 |
| #2 | ageing:ab,ti OR latelife:ab,ti OR laterlife:ab,ti OR 'late life':ab,ti OR 'later life':ab,ti OR elder*:ab,ti OR geron*:ab,ti OR geriatr*:ab,ti OR senior*:ab,ti OR older:ab,ti |
| #3 | (old* NEAR/3 (age* OR adult* OR population* OR people* OR person*)):ab,ti                                                                                                      |
| #4 | ((aging OR aged) NEAR/3 (adult* OR population* OR people* OR person*)):ab,ti                                                                                                   |
| #5 | #1 OR #2 OR #3 OR #4                                                                                                                                                           |
| #6 | 'prisoner'/exp                                                                                                                                                                 |
| #7 | (incarcerat* OR prison* OR inmate* OR 'correctional facilit*' OR 'correctional setting*' OR 'correctional system*' OR Imprison* OR penal):ti,ab                                |

|     |                                                                                                                                                                                    |
|-----|------------------------------------------------------------------------------------------------------------------------------------------------------------------------------------|
| #8  | parole*:ab,ti OR offender*:ab,ti OR crimin*:ab,ti OR inmate*:ab,ti OR penitentiary*:ab,ti OR detain*:ab,ti OR sentenced:ab,ti OR convict*:ab,ti OR (justice NEAR/3 involved):ab,ti |
| #9  | #6 OR #7 OR #8                                                                                                                                                                     |
| #10 | #5 AND #9                                                                                                                                                                          |

### **Soc Abstracts (Proquest)**

|     |                                                                                                                                                                                                                                                   |
|-----|---------------------------------------------------------------------------------------------------------------------------------------------------------------------------------------------------------------------------------------------------|
| S1  | SU.EXACT("Elderly") OR SU.EXACT("Geriatrics") OR SU.EXACT("Gerontology")                                                                                                                                                                          |
| S2  | AB,TI((ageing OR latelife OR laterlife OR "late life" OR "later life" OR elder* OR Geron* OR Geriatr* OR senior* OR older))                                                                                                                       |
| S3  | AB,TI(old* N/3 (age* OR adult* OR population* OR communit* OR people* OR person*))                                                                                                                                                                |
| S4  | AB,TI((aging OR aged) N/3 (adult* OR population* OR communit* OR people* OR person*))                                                                                                                                                             |
| S5  | S1 OR S2 OR S3 OR S4                                                                                                                                                                                                                              |
| S6  | SU.EXACT("Imprisonment") OR SU.EXACT("Correctional System") OR SU.EXACT("Prison Culture") OR SU.EXACT("Prisonization") OR SU.EXACT("Offenders") OR SU.EXACT("Penal Reform") OR SU.EXACT("Prisoners" OR "Prisoners of War") OR SU.EXACT("Prisons") |
| S7  | AB,TI(incarcerat* OR prison* OR inmate* OR correctional facilit* OR correctional setting* OR correctional system* OR Imprison* OR penal)                                                                                                          |
| S8  | AB,TI(Parole* OR offender* OR crimin* OR inmate* OR penitentiary* OR detain* OR sentenced OR convict* OR (justice N/3 involved))                                                                                                                  |
| S9  | S6 OR S7 OR S8                                                                                                                                                                                                                                    |
| S10 | S5 AND S9                                                                                                                                                                                                                                         |

### **Criminal Justice Abstracts with Full Text**

|    |                                                                                                                                                                                                                                                                                                                                                                                                                                                                                                                                                                                                                                                                        |
|----|------------------------------------------------------------------------------------------------------------------------------------------------------------------------------------------------------------------------------------------------------------------------------------------------------------------------------------------------------------------------------------------------------------------------------------------------------------------------------------------------------------------------------------------------------------------------------------------------------------------------------------------------------------------------|
| S1 | <b>DE</b> (ageing OR latelife OR laterlife OR "late life" OR "later life" OR elder* OR Geron* OR Geriatr* OR senior* OR older) OR <b>TI</b> (ageing OR latelife OR laterlife OR "late life" OR "later life" OR elder* OR Geron* OR Geriatr* OR senior* OR older) OR <b>AB</b> (ageing OR latelife OR laterlife OR "late life" OR "later life" OR elder* OR Geron* OR Geriatr* OR senior* OR older) OR <b>KW</b> (ageing OR latelife OR laterlife OR "late life" OR "later life" OR elder* OR Geron* OR Geriatr* OR senior* OR older) OR <b>SU</b> (ageing OR latelife OR laterlife OR "late life" OR "later life" OR elder* OR Geron* OR Geriatr* OR senior* OR older) |
| S2 | <b>TI</b> (old* N3 (age* OR adult* OR population* OR communit* OR people* OR person*)) OR <b>AB</b> (old* N3 (age* OR adult* OR population* OR communit* OR people* OR person*)) OR <b>KW</b> (old* N3 (age* OR adult* OR population* OR communit* OR people* OR person*)) OR <b>SU</b> (old* N3 (age* OR adult* OR population* OR communit* OR people* OR person*))                                                                                                                                                                                                                                                                                                   |
| S3 | <b>TI</b> ((aging OR aged) N3 (adult* OR population* OR communit* OR people* OR person*)) OR <b>AB</b> ((aging OR aged) N3 (adult* OR population* OR communit* OR people* OR person*)) OR <b>KW</b> ((aging OR aged) N3 (adult* OR population* OR                                                                                                                                                                                                                                                                                                                                                                                                                      |

|    |                                                                                                                                                                                                                                                                                                                                                                                                                                                                                                                                                                                                                                                                                                                                                   |
|----|---------------------------------------------------------------------------------------------------------------------------------------------------------------------------------------------------------------------------------------------------------------------------------------------------------------------------------------------------------------------------------------------------------------------------------------------------------------------------------------------------------------------------------------------------------------------------------------------------------------------------------------------------------------------------------------------------------------------------------------------------|
|    | communit* OR people* OR person*)) OR <b>SU</b> ((aging OR aged) N3 (adult* OR population* OR communit* OR people* OR person*))                                                                                                                                                                                                                                                                                                                                                                                                                                                                                                                                                                                                                    |
| S4 | S1 OR S2 OR S3                                                                                                                                                                                                                                                                                                                                                                                                                                                                                                                                                                                                                                                                                                                                    |
| S5 | <b>DE</b> (incarcerat* OR prison* OR inmate* OR correctional facilit* OR correctional setting* OR correctional system* OR Imprison* OR penal) OR <b>TI</b> (incarcerat* OR prison* OR inmate* OR correctional facilit* OR correctional setting* OR correctional system* OR Imprison* OR penal) OR <b>AB</b> (incarcerat* OR prison* OR inmate* OR correctional facilit* OR correctional setting* OR correctional system* OR Imprison* OR penal) OR <b>KW</b> (incarcerat* OR prison* OR inmate* OR correctional facilit* OR correctional setting* OR correctional system* OR Imprison* OR penal) OR <b>SU</b> (incarcerat* OR prison* OR inmate* OR correctional facilit* OR correctional setting* OR correctional system* OR Imprison* OR penal) |
| S6 | <b>DE</b> (Parole* OR offender* OR crimin* OR inmate* OR penitentiari* OR detain* OR sentenced OR convict* OR (justice N/3 involved)) OR <b>TI</b> (Parole* OR offender* OR crimin* OR inmate* OR penitentiari* OR detain* OR sentenced OR convict* OR (justice N/3 involved)) OR <b>AB</b> (Parole* OR offender* OR crimin* OR inmate* OR penitentiari* OR detain* OR sentenced OR convict* OR (justice N/3 involved)) OR <b>KW</b> (Parole* OR offender* OR crimin* OR inmate* OR penitentiari* OR detain* OR sentenced OR convict* OR (justice N/3 involved)) OR <b>SU</b> (Parole* OR offender* OR crimin* OR inmate* OR penitentiari* OR detain* OR sentenced OR convict* OR (justice N/3 involved))                                         |
| S7 | S5 OR S6                                                                                                                                                                                                                                                                                                                                                                                                                                                                                                                                                                                                                                                                                                                                          |
| S7 | S4 AND S7                                                                                                                                                                                                                                                                                                                                                                                                                                                                                                                                                                                                                                                                                                                                         |
